# Supplementary material
Source: publisher figshare collection journal article supplement (https://acs.figshare.com/ndownloader/files/10481725)
Supplement: Supplementary file 1 [file 10481725]

## **Supporting Information**

Determination of the Geographical and Botanical Origin of Hops (*Humulus lupulus* L.) Using Stable Isotopes of C, N and S

Miha Ocvirk<sup>1</sup>, Nives Ogrinc<sup>2</sup>, Iztok Jože Košir<sup>1\*</sup>

<sup>1</sup>Institute for Hop Research and Brewing, Cesta Žalskega Tabora 2, SI-3310 Žalec, Slovenia

<sup>2</sup>Department of Environmental Sciences, “J. Stefan” Institute, Jamova 39, SI-1000 Ljubljana, Slovenia

\*Corresponding author. Tel: 00386 371 21 608, E-mail address: iztok.kosir@ihps.si

Figure S1 Scatter plot of the samples from 10 major hop growing regions all over the World, according to their  $\delta^{13}\text{C}$  and  $\delta^{15}\text{N}$  values. Samples are marked as in the section materials and methods – sampling.

Figure S2 Scatter plot of the samples from 10 major hop growing regions all over the World, according to their  $\delta^{34}\text{S}$  and  $\delta^{13}\text{C}$  values. Samples are marked as in the section materials and methods – sampling.

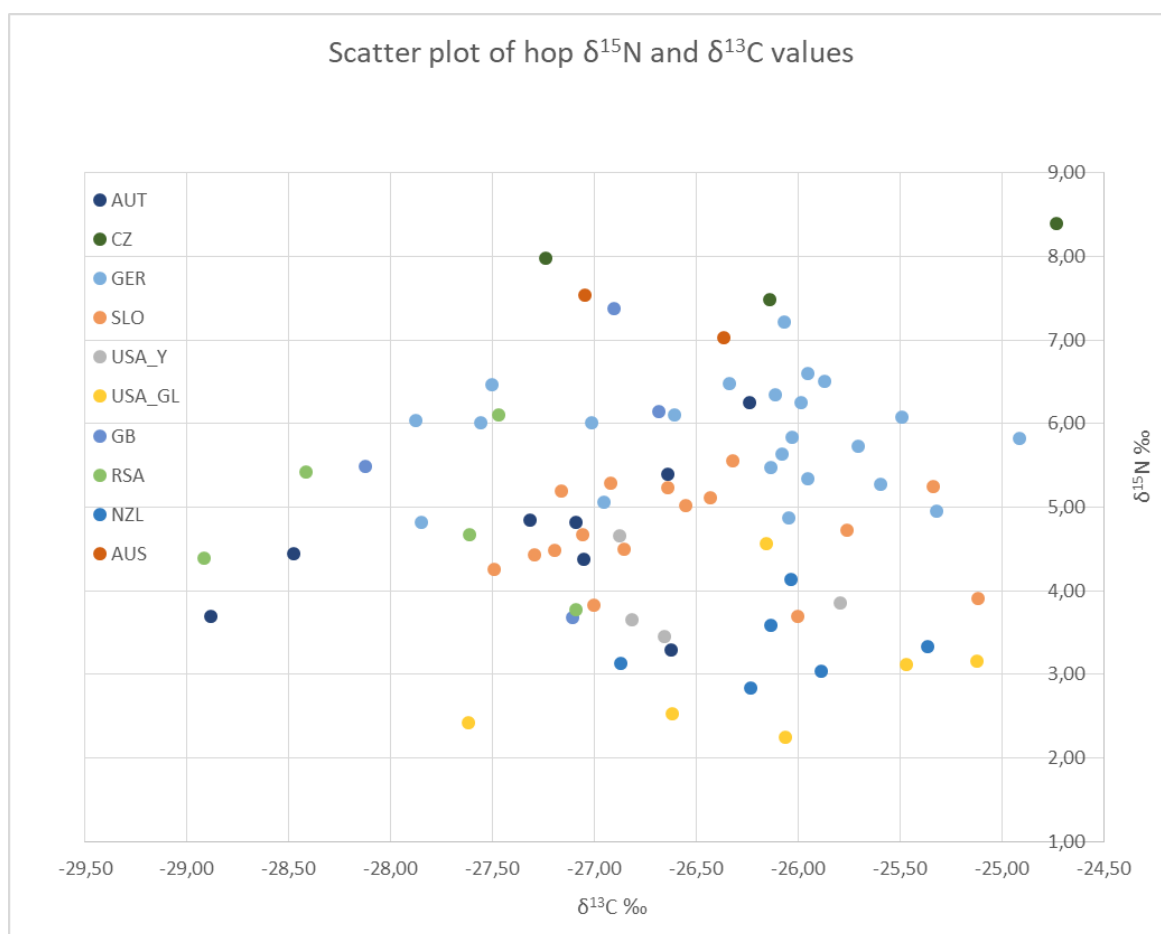

Figure S1. Scatter plot of the samples from 10 major hop growing regions all over the World, according to their  $\delta^{13}\text{C}$  and  $\delta^{15}\text{N}$  values. Samples are marked as in the section materials and methods – sampling.

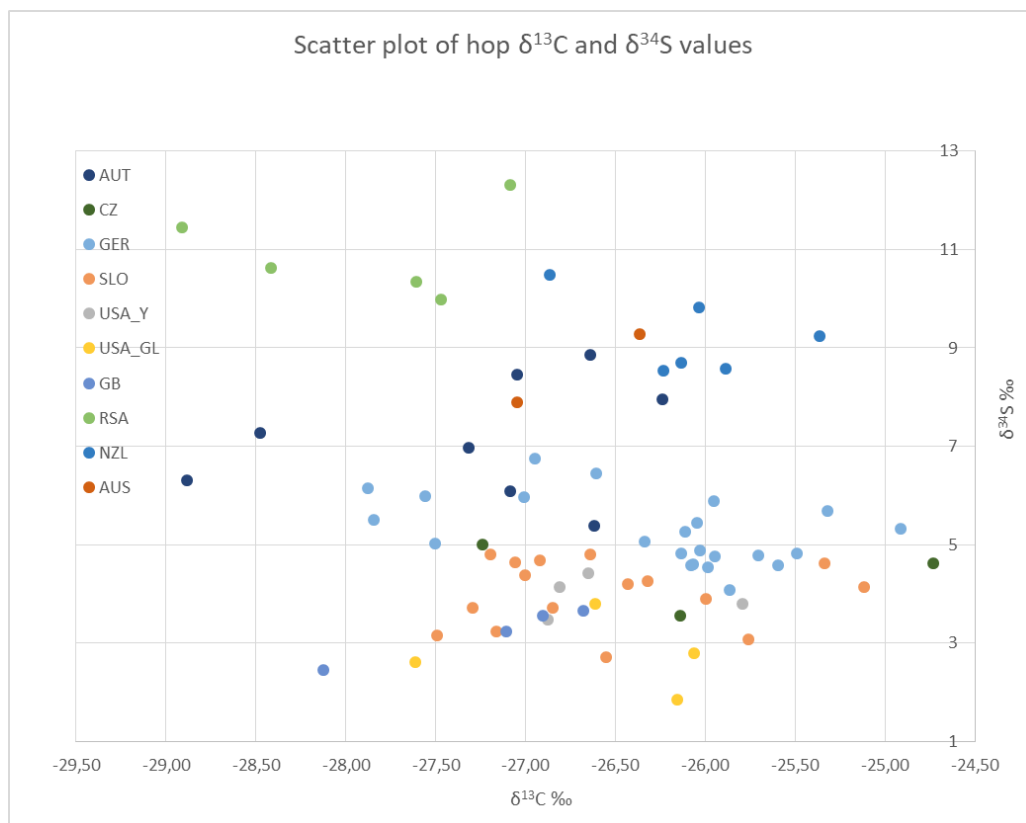

Figure S2. Scatter plot of the samples from 10 major hop growing regions all over the World, according to their  $\delta^{34}\text{S}$  and  $\delta^{13}\text{C}$  values. Samples are marked as in the section materials and methods – sampling.
